# Supplementary material for: Functional Expression of TRP Ion Channels in Endometrial Stromal Cells of Endometriosis Patients
Source: PubMed Central journal article supplement (PMC6163224; doi:10.3390/ijms19092467), 2018-08-21
Supplement: ijms-19-02467-s001.pdf [file ijms-19-02467-s001.pdf]

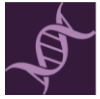

1

2 **5. Supplementary material**

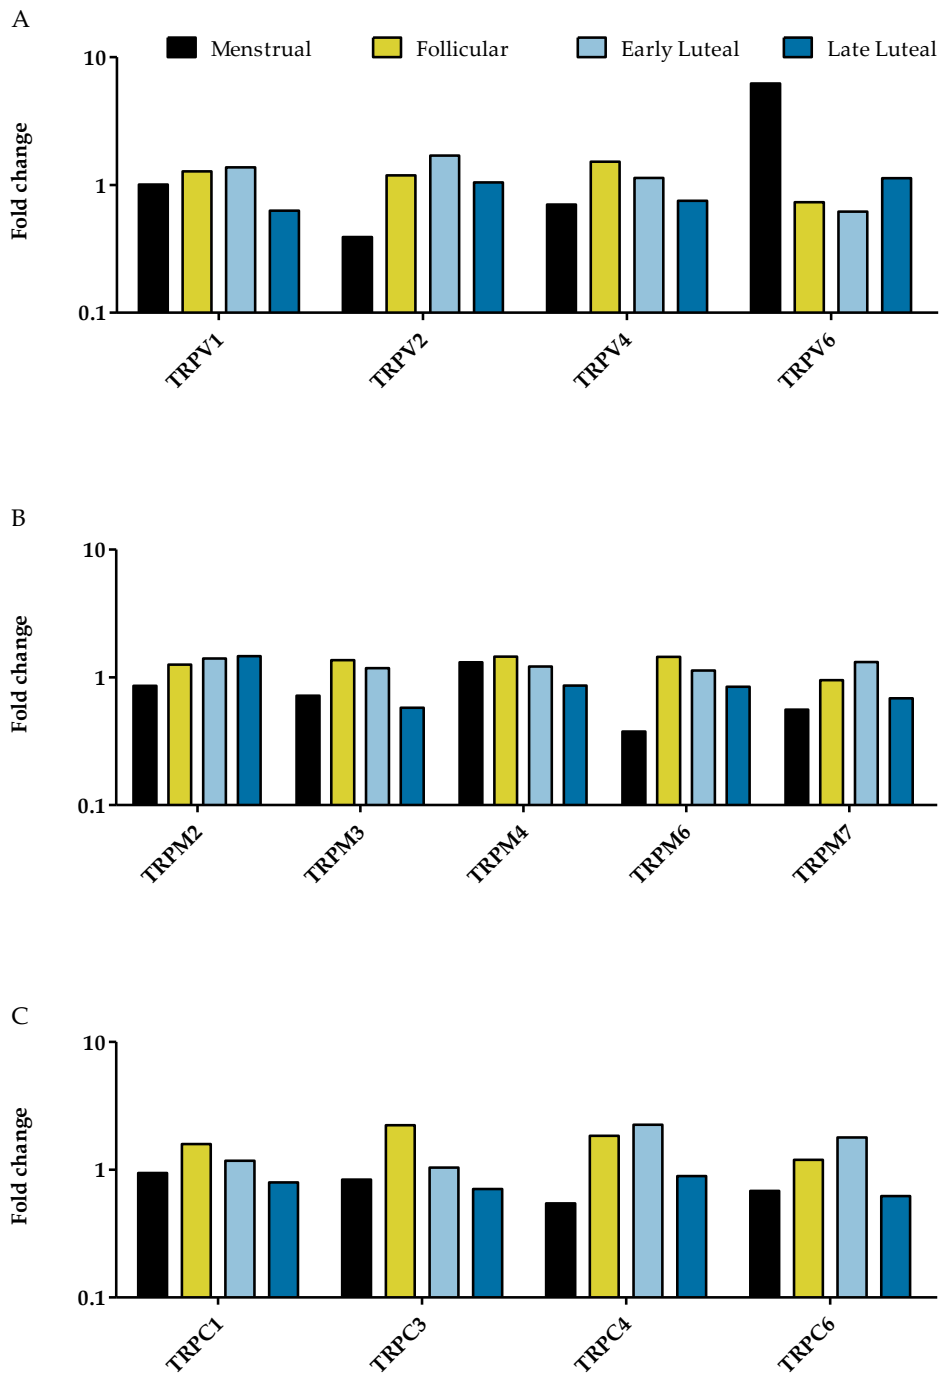

3

4

**Figure S1. The fold change of mRNA expression to controls [7] (a) TRPV-A; (b) TRPM; (c) TRPC.**

5

Data shown as  $2^{-(\Delta\Delta Cq)}$ . ( $\Delta\Delta Cq = \Delta Cq_{\text{endometriosis}} - \Delta Cq_{\text{control}}$ )

6

7

8

9

10

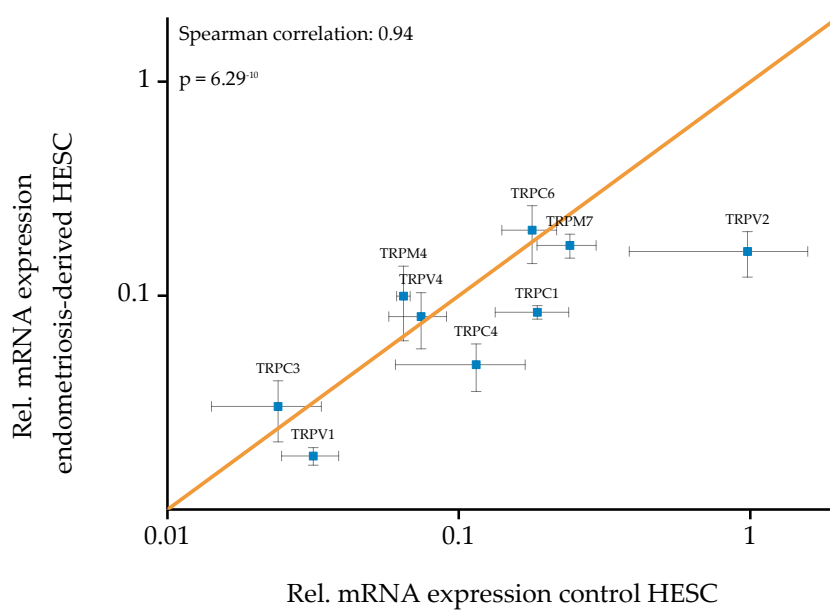

11  
 12  
 13

14 **Figure S2. Correlation between the mRNA expression of TRP channels in control hESC (n = 3) and**  
 15 **endometriosis-derived hESC (n = 4).** The correlation was assessed using the non-parametric  
 16 Spearman correlation test.

17  
 18  
 19  
 20  
 21  
 22  
 23  
 24  
 25  
 26  
 27  
 28  
 29

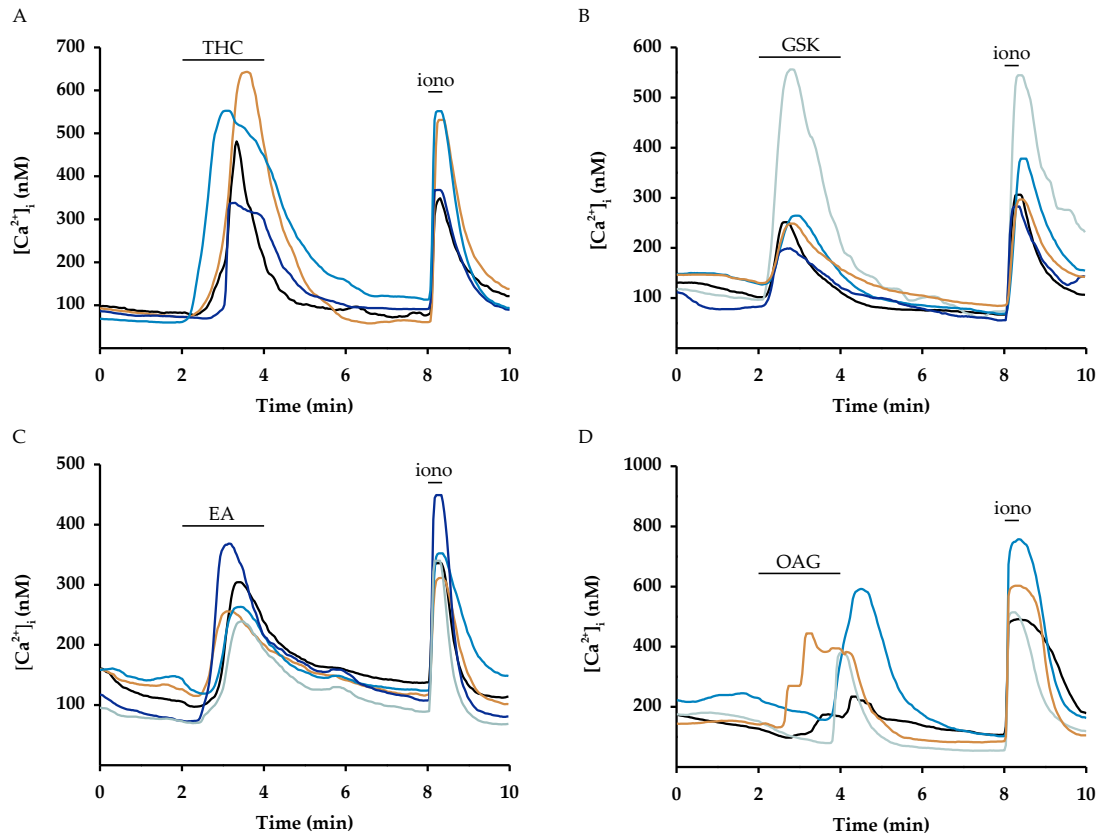

30

31

32 **Figure S3. Representative traces of individual endometriosis-derived hESC illustrating TRP**  
 33 **functionality (a-d)** Application of respectively 50  $\mu\text{M}$  THC, 10 nM GSK, 250 nM EA and 100  $\mu\text{M}$  OAG  
 elicit a robust and reversible influx of calcium in hESC derived from endometriosis-patients.

33

34

35

36

37

38

39

40

41

42

43

44

45

46

47

48

49

50

51

52

53

54

55

56

57

58

59  
60

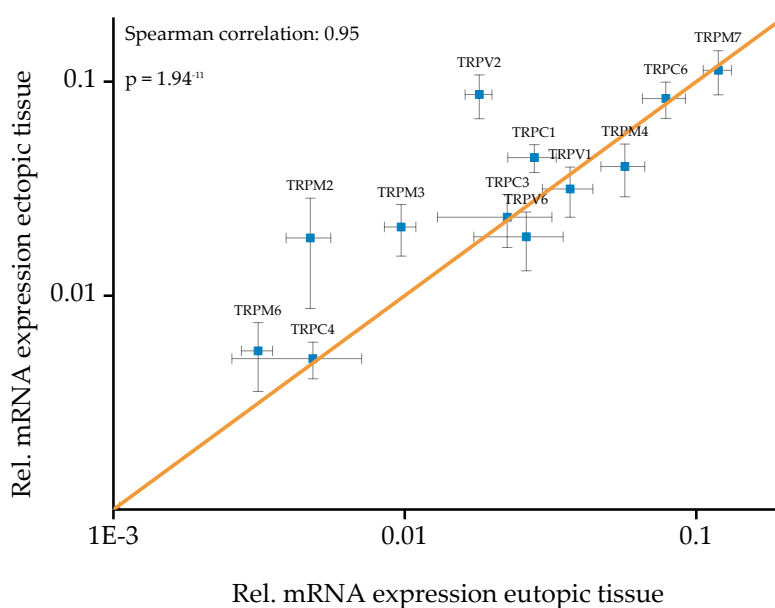

61  
62  
63

64  
65  
66

**Figure S4. Correlation between the mRNA expression of TRP channels in paired eutopic and ectopic tissue samples (n=3).** The correlation was assessed using the non-parametric Spearman correlation test.

67  
68  
69  
70  
71  
72  
73  
74  
75  
76  
77  
78  
79  
80  
81  
82  
83  
84  
85  
86

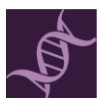

| ENDOMETRIAL BIOPSIES |                       |           |             |             |                          |         |                              |
|----------------------|-----------------------|-----------|-------------|-------------|--------------------------|---------|------------------------------|
| Sample               | Endometriosis stadium | AFS score | Cycle phase | Age (years) | BMI (kg/m <sup>2</sup> ) | Smoking | Time interval between menses |
| 1                    | II                    | 10        | Menstrual   | 38          | 23.7                     | No      | Normal                       |
| 2                    | II                    | 14        | Menstrual   | 37          | 23.3                     | No      | Normal                       |
| 3                    | II                    | 8         | Menstrual   | 31          | 16.2                     | No      | Normal                       |
| 4                    | II                    | 12        | Menstrual   | 28          | 18.9                     | Yes     | Normal                       |
| 5                    | II                    | 15        | Menstrual   | 35          | 26.6                     | No      | Normal                       |

|   |    |    |            |    |      |     |        |
|---|----|----|------------|----|------|-----|--------|
| 1 | II | 12 | Follicular | 32 | 21.8 | No  | Normal |
| 2 | II | 10 | Follicular | 34 | 26.6 | No  | Normal |
| 3 | II | 6  | Follicular | 21 | 19   | Yes | Normal |
| 4 | II | 10 | Follicular | 33 | 21.6 | No  | Normal |
| 5 | II | 6  | Follicular | 29 | 21.9 | No  | Normal |
| 6 | II | 8  | Follicular | 34 | 25.3 | No  | Normal |

|   |    |    |              |    |      |    |        |
|---|----|----|--------------|----|------|----|--------|
| 1 | II | 12 | Early luteal | 37 | nd   | nd | nd     |
| 2 | II | 18 | Early luteal | 33 | 20.8 | No | Normal |
| 3 | II | 10 | Early luteal | 30 | 29.8 | No | Normal |
| 4 | II | 6  | Early luteal | 35 | 19.6 | No | Normal |

|   |    |    |             |    |      |     |        |
|---|----|----|-------------|----|------|-----|--------|
| 1 | II | 8  | Late luteal | 31 | 20.4 | No  | Normal |
| 2 | II | 8  | Late luteal | 26 | 20.5 | Yes | Normal |
| 3 | II | 10 | Late luteal | 31 | 17.6 | No  | Normal |

87

88

89

**Table S1. Demographics and information of cycle phases/days for each endometrial biopsy.**  
Normal time between menses equals 24–38 days; nd: not determined due to lack of information.

90

91

92

93

94

95

96

97

98

99

100

101

102

103

104

| PRIMARY HUMAN ENDOMETRIAL STROMAL CELLS |                       |           |             |             |                          |              |                              |                          |                  |       |       |
|-----------------------------------------|-----------------------|-----------|-------------|-------------|--------------------------|--------------|------------------------------|--------------------------|------------------|-------|-------|
| Sample                                  | Endometriosis stadium | AFS score | Cycle phase | Age (years) | BMI (kg/m <sup>2</sup> ) | Smoking      | Time interval between menses | Experimental destination |                  |       |       |
|                                         |                       |           |             |             |                          |              |                              | qPCR                     | Ca <sup>2+</sup> | Prol. | Migr. |
| 1                                       | 0                     | n/a       | Luteal      | 29          | 19.2                     | Occasionally | Normal                       |                          | X                |       |       |
| 2                                       | 0                     | n/a       | Luteal      | 31          | 21.2                     | No           | Normal                       |                          | X                |       |       |
| 3                                       | 0                     | n/a       | Luteal      | 26          | 31.6                     | Yes          | Normal                       | X                        | X                |       |       |
| 4                                       | 0                     | n/a       | Luteal      | 40          | 18.6                     | No           | Normal                       | X                        | X                | X     | X     |
| 5                                       | 0                     | n/a       | Luteal      | 27          | 25.3                     | Yes          | Infrequent                   | X                        | X                | X     | X     |
| 6                                       | 0                     | n/a       | Luteal      | 29          | 24.6                     | No           | Normal                       |                          | X                | X     | X     |
| 7                                       | 0                     | n/a       | Luteal      | 39          | 28                       | No           | Normal                       |                          | X                | X     | X     |

|   |     |    |        |    |      |    |        |   |   |   |   |
|---|-----|----|--------|----|------|----|--------|---|---|---|---|
| 1 | II  | 8  | Luteal | 31 | 20.2 | No | Normal |   | X | X | X |
| 2 | II  | 12 | Luteal | 28 | 23   | No | Normal | X | X |   |   |
| 3 | II  | 8  | Luteal | 36 | 19.1 | No | Normal |   | X | X | X |
| 4 | II  | 8  | Luteal | 30 | 20.8 | No | Normal | X | X | X | X |
| 5 | II  | 8  | Luteal | 37 | 31.6 | No | Normal | X | X |   |   |
| 6 | II  | 8  | Luteal | 28 | 21.5 | No | Normal | X | X | X | X |
| 7 | III | 16 | Luteal | 34 | 24.5 | No | Normal |   | X |   |   |
| 8 | III | 40 | Luteal | 27 | 19.8 | No | Normal |   | X |   |   |

105 **Table S2. Demographics and reproductive information for each endometrial biopsy.** Normal time  
 106 between menses equals 24–38 days; n/a: not applicable.

107  
 108  
 109  
 110  
 111  
 112  
 113  
 114  
 115  
 116  
 117  
 118  
 119  
 120  
 121  
 122  
 123  
 124  
 125

| PAIRED EUTOPIC AND ECTOPIC TISSUE |                       |           |             |             |                          |         |                              |                                    |
|-----------------------------------|-----------------------|-----------|-------------|-------------|--------------------------|---------|------------------------------|------------------------------------|
| Sample                            | Endometriosis stadium | AFS score | Cycle phase | Age (years) | BMI (kg/m <sup>2</sup> ) | Smoking | Time interval between menses | Ectopic lesion                     |
| 1                                 | II                    | 8         | Follicular  | 30          | 23.6                     | No      | Normal                       | Superficial lesion; pararectal     |
| 2                                 | II                    | 8         | Follicular  | 25          | 29.4                     | No      | Normal                       | Superficial lesion; pararectal     |
| 3                                 | II                    | 10        | Follicular  | 36          | 21.5                     | No      | Normal                       | Superficial lesion; uterovesicular |

126 **Table S3. Demographics and reproductive information of the paired eutopic and ectopic tissues.**  
 127 Normal time between menses equals 24–38 days

128  
 129  
 130  
 131  
 132  
 133  
 134  
 135  
 136  
 137  
 138  
 139  
 140  
 141  
 142  
 143  
 144  
 145  
 146  
 147  
 148  
 149  
 150  
 151  
 152  
 153  
 154  
 155  
 156  
 157  
 158  
 159  
 160  
 161  
 162  
 163  
 164  
 165  
 166  
 167  
 168

| TAQMAN GENE EXPRESSION ASSAYS |               |                |               |                |                 |
|-------------------------------|---------------|----------------|---------------|----------------|-----------------|
| Gene name                     | Assay ID      | RefSeq ID      | Exon boundary | Assay location | Amplicon length |
| TRPA1                         | Hs00175798_m1 | NM_007332.2    | 2–3           | 441            | 124             |
| TRPV1                         | Hs00218912_m1 | NM_018727.5    | 8–9           | 1540           | 94              |
| TRPV2                         | Hs00901640_m1 | NM_016113.4    | 14–15         | 2591           | 72              |
| TRPV3                         | Hs01000530_m1 | NM_001258205.1 | 14–15         | 2128           | 121             |
| TRPV4                         | Hs01099348_m1 | NM_001177428.1 | 2–3           | 586            | 65              |
| TRPV5                         | Hs00219765_m1 | NM_019841.4    | 7–8           | 1176           | 96              |
| TRPV6                         | Hs01114089_g1 | NM_018646.4    | 7–8           | 1138           | 59              |
| TRPM1                         | Hs00931865_m1 | NM_001252020.1 | 2–3           | 448            | 91              |
| TRPM2                         | Hs01066071_m1 | NM_003307.3    | 9–10          | 1419           | 74              |
| TRPM3                         | Hs00257553_m1 | NM_001007470.1 | 3–4           | 356            | 83              |
| TRPM4                         | Hs00214167_m1 | NM_001195227.1 | 12–13         | 1852           | 60              |
| TRPM5                         | Hs00175822_m1 | NM_014555.3    | 18–19         | 1795           | 79              |
| TRPM6                         | Hs01019353_m1 | NM_001177310.1 | 13–14         | 1555           | 68              |
| TRPM7                         | Hs00918956_m1 | NM_017672.4    | 38–39         | 5745           | 148             |
| TRPM8                         | Hs00375481_m1 | NM_024080.4    | 2–3           | 157            | 106             |
| TRPC1                         | Hs00608195_m1 | NM_001251845.1 | 6–7           | 1097           | 137             |
| TRPC3                         | Hs00162985_m1 | NM_001130698.1 | 4–5           | 1416           | 58              |
| TRPC4                         | Hs00211805_m1 | NM_001135955.1 | 8–9           | 2312           | 76              |
| TRPC5                         | Hs00202960_m1 | NM_012471.2    | 6–7           | 2623           | 75              |
| TRPC6                         | Hs00989190_m1 | NM_004621.5    | 3–4           | 1558           | 87              |
| TRPC7                         | Hs00220638_m1 | NM_001167576.1 | 4–5           | 1458           | 55              |
| ACTB                          | Hs01060665_g1 | NM_001101.3    | 2–3           | 208            | 63              |
| GAPDH                         | Hs02758991_g1 | NM_001256799.2 | 6–7           | 752            | 93              |
| HPRT1                         | Hs02800695_m1 | NM_000194.2    | 2–3           | 297            | 82              |
| PGK-1                         | Hs00943178_g1 | NM_000291.2    | 5–6           | 697            | 73              |
| TPB                           | Hs00427620_m1 | NM_001172085.1 | 2–3           | 578            | 91              |

169

170

Table S4. List of used Taqman genes (Applied Biosystems).
